# Supplementary material for: Addressing Stigma to Advance Health Equity: General Practice Interns’ Perspectives on Vulnerable Patients, a qualitative study
Source: Research Square preprint supplement (doi:10.21203/rs.3.rs-6367742/v1), 2025-05-08
Supplement: Supplementary file 1 [file c23121d5cbab0898d26b2897.docx]

Appendix 1

**Qualitative Research Interview Guide**

**Title of the Study**:
**Participant Code**: *[To be filled]*
**Date**: *[To be filled]*

**1. Introduction and Background Information**

**Objective**: To collect key sociodemographic and educational data.

**Prompt**:
“Could you please introduce yourself?”

**Topics to explore**:

- Age
- Gender
- Sibling composition
- Parents’ occupations
- Educational background
- Professional trajectory
- Motivation for studying medicine

**2. Experience with a Vulnerable Patient**

**Objective**: To explore the participant’s experience with a socially or economically vulnerable patient.

**Main question**:
“Can you describe a situation in which you interacted with a patient in a vulnerable situation?”

**Follow-up prompts**:

- “How did you feel during the consultation?”
- “What difficulties did you encounter?”
- “What indicators led you to perceive the patient as vulnerable?”

**Note**: Observe how the participant defines and identifies vulnerability.

**3. Perceptions of Social Health Inequalities (SHIs)**

**Objective**: To assess awareness and understanding of social health inequalities and the participant’s attitudes toward them.

**Main question**:
“Can you share a situation in which you witnessed social health inequalities?”

**Follow-up prompts**:

- “What does the concept of ‘social health inequalities’ mean to you?”
- “How did you respond to that situation?”
- “In your opinion, are vulnerable patients more likely to experience illness? Why or why not?”

**4. Advising Patients on Social Rights**

**Objective**: To assess the participant’s knowledge and experience in informing patients about social support systems.

**Main question**:
“Can you tell me about a time when you had to advise a patient on their social rights?”

**Follow-up prompts**:

- “How did you feel in that situation?”
- “Do you feel adequately prepared for such interactions?”
- “What do you know about the Social Health Coverage scheme (SHC)?”

**Note**: Introduce the concept of SHC only if not spontaneously mentioned.

**5. Reflections on Medical Training Related to Vulnerability**

**Objective**: To understand how the participant perceives their training with regard to social vulnerability.

**Main question**:
“What is your opinion of the training you have received concerning vulnerable populations?”

**Follow-up prompts**:

- “Which elements of the training supported or hindered your learning?”
- “How do you think the training could be improved?”

**6. Professional Intentions Regarding Vulnerable Contexts**

**Objective**: To explore the participant’s willingness to work in underserved or vulnerable settings.

**Main question**:
“Based on everything you've shared, can you see yourself working or setting up practice in a socially vulnerable area?”

**Follow-up prompts**:

- “Why or why not?”
- “What challenges might make you hesitate?”
- “How do you explain why some doctors refuse to treat patients covered by CMU?”

**7. Defining Vulnerability**

*(Included from the second round of interviews onward)*
**Objective**: To explore the participant’s own definition and representations of vulnerability.

**Main question**:
“In your view, what does it mean to be in a vulnerable situation or to experience vulnerability?”

**Follow-up prompts**:

- Explore notions of happiness, fate, and individual versus structural causes of vulnerability.

**8. Closing the Interview**

**Objective**: To provide the participant an opportunity to share additional thoughts.

**Prompt**:
“Is there anything else you would like to discuss before we conclude the interview?”
